# Variability of Blood Glucose Concentration and Short-term Mortality in Critically Ill Patients

Moritoki Egi, M.D.,\* Rinaldo Bellomo, M.D., F.J.F.I.C.M.,† Edward Stachowski, M.D.,‡  
Craig J. French, M.D.,§ Graeme Hart, M.D.||

**Background:** Intensive insulin therapy may reduce mortality and morbidity in selected surgical patients. Intensive insulin therapy also reduced the SD of blood glucose concentration, an accepted measure of variability. There is no information on the possible significance of variability in glucose concentration.

**Methods:** The methods included extraction of blood glucose values from electronically stored biochemical databases and of data on patient's characteristics, clinical features, and outcome from electronically stored prospectively collected patient databases; calculation of SD of glucose as a marker of variability and of several indices of glucose control in each patient; and statistical assessment of the relation between these variables and intensive care unit mortality.

**Results:** There were 168,337 blood glucose measurements in the study cohort of 7,049 critically ill patients (4.2 hourly measurements on average). The mean  $\pm$  SD of blood glucose concentration was  $1.7 \pm 1.3$  mm in survivors and  $2.3 \pm 1.6$  mm in nonsurvivors ( $P < 0.001$ ). Using multiple variable logistic regression analysis, both mean and SD of blood glucose were significantly associated with intensive care unit mortality ( $P < 0.001$ ; odds ratios [per 1 mm] 1.23 and 1.27, respectively) and hospital mortality ( $P < 0.001$  and  $P = 0.013$ ; odds ratios [per 1 mm] 1.21 and 1.18, respectively).

**Conclusions:** The SD of glucose concentration is a significant independent predictor of intensive care unit and hospital mortality. Decreasing the variability of blood glucose concentration might be an important aspect of glucose management.

ACUTE hyperglycemia associated with insulin resistance is common in critically ill patients.<sup>1,2</sup> Acute control of blood glucose is considered important.<sup>3–8</sup> Recently, intensive insulin therapy (target glucose concentration of 4.4–6.1 mm) was reported to reduce mortality and morbidity in selected surgical patients.<sup>9</sup> Therefore, decreasing mean blood glucose concentration may improve

patient outcome in the critical care setting. Intensive insulin therapy was also associated with a reduction in the SD of blood glucose concentration, an accepted measure of variability (1.05 mm in intensive insulin therapy group *vs.* 1.83 mm in conventional control group; relative reduction of 42%). However, the benefit of intensive insulin therapy was ascribed to a reduction in the mean glucose concentration rather than minimization of its variability. Currently, there is no information on the possible significance of variability in glucose concentration. This is unfortunate, because fluctuations in glucose concentration might be pathophysiologically important, especially from a neurologic perspective,<sup>10</sup> and possibly as important as sustained hyperglycemia. We hypothesized that the SD (a parameter commonly used to describe variability of measurement) of blood glucose concentration would independently predict mortality in a population of critically ill patients.

We tested this hypothesis in patients admitted to the intensive care units (ICUs) of four hospitals and compared the predictive ability of SD with other indices of blood glucose control: mean glucose concentration ( $\text{Glu}_{\text{Ave}}$ ), maximum blood glucose concentration during ICU stay ( $\text{Glu}_{\text{Max}}$ ),<sup>11,12</sup> and blood glucose concentration on admission ( $\text{Glu}_{\text{Adm}}$ ).<sup>13,14</sup> We further compared the mean and SD of blood glucose concentration during the first 24 h ( $\text{Glu1}_{\text{Ave}}$  and  $\text{Glu1}_{\text{SD}}$ ), because glucose concentration on the day of admission has been shown to be an accurate predictor of ICU patient outcome.<sup>15,16</sup>

## Materials and Methods

The data collection for this study was part of a preexisting quality assurance activity, approved by local institutional ethics committees. The Austin Hospital Ethics Committee (Heidelberg, Victoria, Australia) approved this investigation.

### Study Population and Data Sources

The current study was conducted as a multicenter retrospective observational study. Hospitals A and B are tertiary public hospitals in Melbourne, Australia. Hospital C is a large private hospital in Melbourne. Hospital D is a tertiary public hospital in Sydney. All patients admitted to these ICUs from January 2000 to October 2004 were included. Time frames in each hospital were fixed according to time periods within which reliable and

This article is accompanied by an Editorial View. Please see: Ouattara A, Grimaldi A, Riou B: Blood glucose variability: A new paradigm in critical care? ANESTHESIOLOGY 2006; 105:233–4.

\* Research Fellow, † Director of Research, || Staff Specialist, Department of Intensive Care, Austin Hospital. ‡ Staff Specialist, Department of Intensive Care, Westmead Hospital. § Director, Department of Intensive Care, Western Hospital.

Received from the Department of Intensive Care, Western Hospital, Footscray, Victoria, Australia; the Department of Intensive Care, Westmead Hospital, Westmead, New South Wales, Australia; the Department of Intensive Care and Department of Medicine, Austin Hospital, Heidelberg, Victoria, Australia; and Waringal Private Hospital, Heidelberg, Victoria, Australia. Submitted for publication June 9, 2005. Accepted for publication March 18, 2006. Supported by the Austin Hospital Anaesthesia and Intensive Care Trust Fund, Heidelberg, Victoria, Australia.

Address correspondence to Dr. Bellomo: Department of Intensive Care, Austin & Repatriation Medical Centre, Heidelberg 3084, Victoria, Australia. rinaldo.bellomo@austin.org.au. Individual article reprints may be purchased through the Journal Web site, www.anesthesiology.org.

complete blood glucose data and patient characteristics could be extracted.

The blood glucose data used for this study were stored electronically by the Bayer Rapidlab blood gas machine systems (Bayer Diagnostics RapiLab 865; Bayer Australia, Sydney, Australia) and captured and retrieved using the Bayer Rapidlink® blood gas information management system (Bayer Diagnostics RapiLab 865).

Age, sex, requirement of mechanical ventilation, the reason of ICU admission, and the Acute Physiology and Chronic Health Evaluation II score<sup>17</sup> were obtained from the clinical databases of each ICU, which had been collected prospectively by trained data collectors. After collection and entry, the data were corrected for logical errors and sent to a central repository where they were further checked before acceptance. Coding for admission diagnosis was by means of a modified Acute Physiology and Chronic Health Evaluation III system used by the Australian and New Zealand Intensive Care Society. The information on clinical outcomes was collected independently by the Australian and New Zealand Intensive Care Society system as well as by each hospital. Audit of mortality and unit-based outcomes is ongoing for all four institutions.

#### *Blood Glucose Indices*

In each patient, the mean and SD of blood glucose concentration during ICU stay ( $Glu_{Ave}$  and  $Glu_{SD}$ ) were calculated as arithmetical mean and SD of the entire set of measurements during ICU stay. To evaluate relative variability, the coefficient of variability ( $Glu_{CV} = Glu_{SD} * 100 / Glu_{Ave}$ ) was also calculated for each patient. The maximum blood glucose in each patient ( $Glu_{Max}$ ) was determined as the highest values during ICU stay. The glucose measurement on admission ( $Glu_{Adm}$ ) was defined as the first glucose measurement after ICU admission.

We also calculated the mean, SD, and maximum of blood glucose concentration for each ICU day.

#### *Diabetic Patients*

Only two hospitals (A and D) had collected prospective information to identify diabetic patients. We used this subcohort to test the effect of diabetes on outcome and the relation between blood glucose control and outcome in diabetic patients.

#### *Blood Glucose Measurements*

Blood glucose measurements were performed by the blood gas analyzer in each hospital. Blood samples were collected in heparinized blood gas syringes. The analyzer measured whole blood samples at 37°C. Trained nursing staff performed all blood analysis. All maintenance was regularly reviewed and certified and complied with Australian national laboratory standards. All maintenance was according to manufacturers' specifications.

#### *Approach to Insulin and Glucose Control*

There was no specific protocol for the use of insulin or any specific target for glucose control during the study across the four hospitals. Commencement of insulin was decided by the ICU medical staff, and adjustment of insulin dose was by ICU nurses with a general goal of maintaining glucose levels between 6 and 10 mM.

#### *Statistical Analysis*

Data are presented as mean with SD, unless otherwise indicated. The primary outcome measure was ICU mortality. The secondary outcome measure was hospital mortality. Patients were separated into ICU survivors and nonsurvivors. Differences were assessed using the Student *t* test, chi-square test, and one-way analysis of variance. The area under the receiver operator characteristics (ROC) curves was calculated for seven blood glucose control indices ( $Glu_{Ave}$ ,  $Glu_{SD}$ ,  $Glu_{CV}$ ,  $Glu_{Max}$ ,  $Glu_{Adm}$ ,  $Glu_{1Ave}$ , and  $Glu_{1SD}$ ). The estimate of the area under the ROC curve was computed using a binegative exponential model and asymptotic 95% confidential intervals (SPSS 12.0; SPSS Inc., Chicago, IL). Curves were compared using their 95% confidence intervals.

We performed multivariate logistic regression analysis entering site, age, sex, Acute Physiology and Chronic Health Evaluation II score, category of ICU admission (cardiac or vascular diseases, thoracic or respiratory diseases, trauma, neurologic diseases, gastrointestinal tract diseases, and other), and surgical or medical admission, as well as six glucose indices ( $Glu_{Ave}$ ,  $Glu_{Max}$ ,  $Glu_{Adm}$ ,  $Glu_{1Ave}$ ,  $Glu_{1SD}$ , and either  $Glu_{SD}$  or  $Glu_{CV}$ ), independent variables, and either ICU or hospital death as the dependent variable. All variables showed significance in univariate analysis. A backward stepwise elimination process was then used to remove covariates whose multivariate *P* value was greater than 0.15. The final model contained all predictors of mortality with a multivariate *P* < 0.15. In all multivariate logistic regression analyses, we assessed (1) the discrimination of the model with the percentages of appropriately classed patients in the final model, (2) the calibration of the model with Hosmer-Lemeshow test, and (3) the role of multicollinearity using the Variance Inflation Factor. Every Variance Inflation Factor was less than 5, indicating absence of severe multicollinearity.

A *P* value less than 0.05 was considered to indicate statistical significance. All statistical analysis was performed using a commercially available statistical program (SPSS 12.0).

#### **Results**

We studied 7,049 patients, including 318 readmissions. These patients had 168,837 blood glucose measurements, with a mean value of  $8.4 \pm 2.7$  mM (glucose measured every 4.2 h on average).

**Table 1. Clinical Characteristics and Glucose Indices of the Study Cohort**

|                                        | Hospital A        | Hospital B        | Hospital C        | Hospital D        | Total             |
|----------------------------------------|-------------------|-------------------|-------------------|-------------------|-------------------|
| Number of patients                     | 3,653             | 1,192             | 904               | 1,300             | 7,049             |
| Male sex                               | 2,219 (61%)       | 660 (55%)         | 617 (68%)         | 791 (61%)         | 4,287 (61%)       |
| Age, yr                                | 61 ± 18           | 55 ± 19           | 69 ± 12           | 61 ± 18           | 61 ± 18           |
| APACHE II score                        | 17 ± 7            | 18 ± 9            | 12 ± 5            | 20 ± 8            | 17 ± 8            |
| Mechanical ventilation rate            | 2,114 (58%)       | 567 (48%)         | 240 (27%)         | 1,300 (100%)      | 4,221 (60%)       |
| Surgical patients                      | 1,459 (40%)       | 291 (24%)         | 715 (79%)         | 581 (45%)         | 3,046 (43%)       |
| ICU mortality                          | 412 (11%)         | 168 (14%)         | 19 (2%)           | 237 (18%)         | 836 (12%)         |
| Hospital mortality                     | 835 (23%)         | 357 (30%)         | 37 (4%)           | 329 (25%)         | 1,558 (22%)       |
| ICU stay, days                         | 3 [2–5]           | 4 [3–6]           | 3 [3–4]           | 5 [3–11]          | 4 [2–6]           |
| Hospital stay, days                    | 17 [9–37]         | 12 [6–25]         | 10 [8–14]         | 20 [10–37]        | 15 [8–32]         |
| Study periods                          | Jan 2000–Dec 2003 | Jan 2002–Oct 2004 | Feb 2003–Jun 2004 | Dec 2000–Jun 2003 | Jan 2000–Oct 2004 |
| Number of measurements                 | 84,610            | 31,201            | 12,024            | 40,502            | 168,337           |
| Mean glucose, mm                       | 8.2 ± 2.1         | 8.1 ± 2.3         | 7.7 ± 1.5         | 7.8 ± 1.8         | 8.0 ± 2.0         |
| SD of glucose, mm                      | 1.8 ± 1.4         | 1.7 ± 1.3         | 1.6 ± 1.1         | 1.6 ± 1.1         | 1.7 ± 1.3         |
| Coefficient of variation of glucose, % | 21 ± 5            | 20 ± 12           | 20 ± 12           | 20 ± 11           | 21 ± 12           |
| Maximum glucose, mm                    | 21.3 ± 12.5       | 11.7 ± 5.1        | 10.5 ± 3.8        | 11.4 ± 4.4        | 11.7 ± 4.9        |
| Admission glucose, mm                  | 9.0 ± 4.3         | 9.2 ± 4.7         | 7.9 ± 2.9         | 8.4 ± 3.7         | 8.8 ± 4.1         |
| Mean glucose during first 24 h, mm     | 8.3 ± 2.6         | 8.0 ± 2.3         | 7.9 ± 1.7         | 8.3 ± 2.7         | 8.2 ± 2.5         |
| SD of glucose during first 24 h, mm    | 1.7 ± 1.6         | 1.6 ± 1.6         | 1.5 ± 1.1         | 1.6 ± 1.4         | 1.6 ± 1.5         |

Data are expressed as mean ± SD, number (percentage), or median [interquartile range].

APACHE = Acute Physiology and Chronic Health Evaluation; ICU = intensive care unit.

Table 1 shows patient characteristics and glucose control details for each study ICU and for the total cohort. The mean  $\text{Glu}_{\text{SD}}$  for all patients was 1.7 mm, and the mean  $\text{Glu}_{\text{CV}}$  was 21%.

Clinical characteristics and glucose indices for ICU survivors and nonsurvivors are shown in table 2.  $\text{Glu}_{\text{SD}}$  was significantly different between ICU survivors and nonsurvivors ( $1.7 \pm 1.3$  and  $2.3 \pm 1.6$  mm, respectively;

$P < 0.001$ ).  $\text{Glu}_{\text{CV}}$  was also significantly different between ICU survivors and nonsurvivors ( $20 \pm 12$  and  $26 \pm 13\%$ , respectively;  $P < 0.001$ ).

Figure 1 shows the daily change in mean, SD, and maximum blood glucose concentrations during the first 14 days. They all changed significantly over time ( $P < 0.001$ ). The highest values for the three glucose indices ( $\text{Glu}_{\text{AVE}}$ ,  $\text{Glu}_{\text{SD}}$ , and maximum blood glucose on admis-

**Table 2. Comparison of ICU Survivors and Nonsurvivors**

|                                        | Survivors (n = 6,213) | Nonsurvivors (n = 836) | P Value |
|----------------------------------------|-----------------------|------------------------|---------|
| Male sex                               | 3,807 (61%)           | 480 (57%)              | 0.03    |
| Age                                    | 61 ± 18               | 65 ± 16                | < 0.001 |
| APACHE II score                        | 16 ± 7                | 27 ± 8                 | < 0.001 |
| Mechanical ventilation rate            | 3,509 (57%)           | 712 (85%)              | < 0.001 |
| Surgical patients                      | 2,831 (46%)           | 215 (26%)              | < 0.001 |
| Reason for ICU admission               |                       |                        | < 0.001 |
| Cardiac and vascular                   | 1,342 (22%)           | 244 (29%)              |         |
| Thoracic and respiratory               | 1,228 (20%)           | 152 (18%)              |         |
| Trauma                                 | 451 (7%)              | 13 (2%)                |         |
| Neurologic                             | 665 (11%)             | 130 (16%)              |         |
| Gastrointestinal tract diseases        | 1,313 (21%)           | 84 (10%)               |         |
| Other                                  | 1,214 (20%)           | 213 (26%)              |         |
| ICU stay, days                         | 4 [2–6]               | 4 [2–7]                | < 0.001 |
| Hospital stay, days                    | 16 [9–34]             | 6 [3–14]               | < 0.001 |
| Duration of mechanical ventilation, h  | 26 [12–88]            | 39 [17–113]            | < 0.001 |
| Mean glucose, mm                       | 7.9 ± 1.9             | 8.8 ± 2.9              | < 0.001 |
| SD of glucose, mm                      | 1.7 ± 1.3             | 2.3 ± 1.6              | < 0.001 |
| Coefficient of variation of glucose, % | 20 ± 12               | 26 ± 13                | < 0.001 |
| Maximum glucose, mm                    | 11.5 ± 4.8            | 13.6 ± 5.4             | < 0.001 |
| Admission glucose, mm                  | 8.7 ± 4.0             | 9.5 ± 4.9              | < 0.001 |
| Mean glucose during first 24 h, mm     | 8.1 ± 2.3             | 9.0 ± 3.3              | < 0.001 |
| SD of glucose during first 24 h, mm    | 1.5 ± 1.4             | 2.2 ± 1.8              | < 0.001 |

Data are expressed as mean ± SD, number (percentage), or median [interquartile range].

APACHE = Acute Physiology and Chronic Health Evaluation; ICU = intensive care unit.

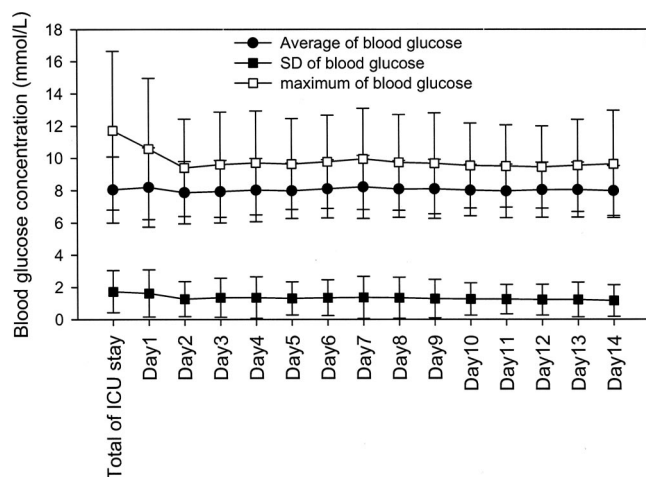

Fig. 1. Average, SD, and maximum of entire blood glucose concentration, for each intensive care unit (ICU) day for all patients for 2 weeks. Lines and error bars are mean  $\pm$  SD.

sion day) were obtained on the first ICU day (fig. 1). These indices were controlled within a narrow range after the second ICU day.

Figure 2 shows the relation between increasing  $\text{Glu}_{\text{SD}}$  and  $\text{Glu}_{\text{Ave}}$ , and ICU and hospital mortality, with patients divided into four subgroups according to quartiles of each glucose index. For  $\text{Glu}_{\text{SD}}$ , ICU and hospital mortality were significantly different among each group ( $P < 0.01$ ). For  $\text{Glu}_{\text{Ave}}$ , ICU and hospital mortality were significantly different among each group ( $P < 0.01$ ), except for the two lowest subgroups ( $< 6.8$  vs.  $6.8-7.9$ ;  $P = 0.79$  for ICU mortality and  $P = 0.76$  for hospital mortality).

Table 3 shows the area under the ROC curve for the glucose control indices.  $\text{Glu}_{\text{SD}}$ ,  $\text{Glu}_{\text{CV}}$ , and  $\text{Glu}_{\text{Max}}$  had a significantly greater area under the ROC curve than  $\text{Glu}_{\text{Ave}}$ ,  $\text{Glu}_{\text{Adm}}$ , and  $\text{Glu}_{\text{Adm}}$ .

Using multivariate logistic regression analysis with ICU mortality as the dependent variable, only four glucose control indices ( $\text{Glu}_{\text{Ave}}$ ,  $\text{Glu}_{\text{SD}}$ ,  $\text{Glu}_{\text{Max}}$ , and  $\text{Glu}_{\text{Adm}}$ )

Table 3. Area under the ROC Curves for Each Glycemic Variable

| Variable                                   | Area under ROC Curve | 95% Confidence Interval |             |
|--------------------------------------------|----------------------|-------------------------|-------------|
|                                            |                      | Lower Limit             | Upper Limit |
| Average of blood glucose                   | 0.60                 | 0.58                    | 0.62        |
| SD of blood glucose                        | 0.65                 | 0.63                    | 0.67        |
| CV of blood glucose                        | 0.64                 | 0.62                    | 0.66        |
| Maximum blood glucose                      | 0.65                 | 0.62                    | 0.67        |
| Admission blood glucose                    | 0.55                 | 0.53                    | 0.57        |
| Average of blood glucose during first 24 h | 0.58                 | 0.56                    | 0.61        |
| SD of blood glucose during first 24 h      | 0.58                 | 0.56                    | 0.61        |

CV = coefficient of variability; ROC = receiver operator characteristics.

achieved statistical significance (table 4). For this model, the area under the ROC was 0.88, and the Hosmer-Lemeshow goodness-of-fit statistic was 14.4 ( $P = 0.072$ ).

When we used  $\text{Glu}_{\text{CV}}$  as the index of variability instead of  $\text{Glu}_{\text{SD}}$ ,  $\text{Glu}_{\text{CV}}$  also predicted ICU mortality ( $P < 0.001$ ; odds ratio 1.03 per each 1% change).

The same analysis with hospital mortality as the dependent variable showed that only  $\text{Glu}_{\text{Ave}}$ ,  $\text{Glu}_{\text{SD}}$ , and  $\text{Glu}_{\text{Adm}}$  remained significant predictors of outcome (table 5). For this model, the area under the ROC was 0.84, and the Hosmer-Lemeshow goodness-of-fit statistic was 12.7 ( $P = 0.123$ ). When we used  $\text{Glu}_{\text{CV}}$  as the index of variability instead of  $\text{Glu}_{\text{SD}}$ ,  $\text{Glu}_{\text{CV}}$  also predicted hospital mortality ( $P < 0.001$ ; odds ratio 1.03 per each 1% change).

In two hospitals (hospitals A and D), we identified 728 diabetic patients within a subcohort of 4,946 study patients. Compared with nondiabetic patients within these two hospitals, diabetic patients displayed no significant relation between glucose control (as assessed by  $\text{Glu}_{\text{SD}}$  and  $\text{Glu}_{\text{Ave}}$ ) and ICU or hospital survival (figs. 3A and B), except for a comparison of lowest and highest hospital

Fig. 2. (A and B) Relation between blood glucose control and intensive care unit (ICU) and hospital mortality in the total cohort. The SD of blood glucose was used as marker of blood glucose control for A, and the mean blood glucose level was used for B.  $\text{Glu}_{\text{Ave}}$  = mean blood glucose concentration;  $\text{Glu}_{\text{SD}}$  = SD of blood glucose concentration.

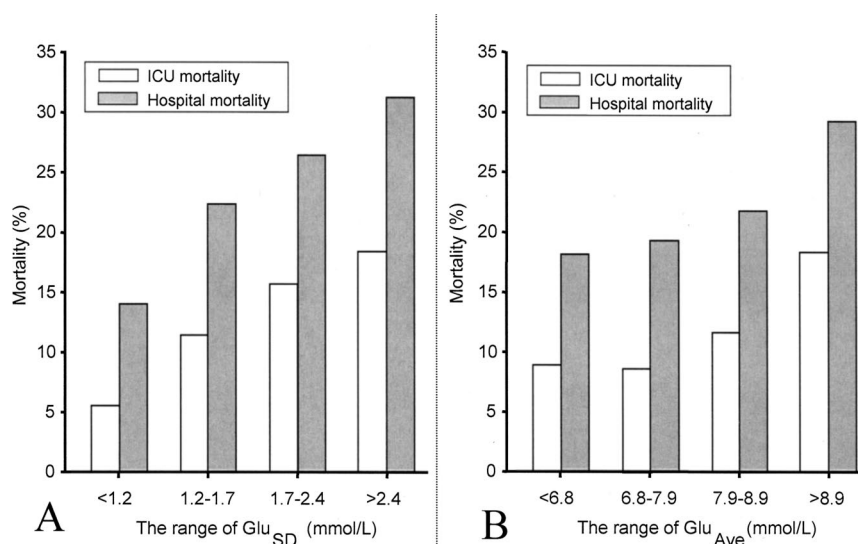



**Table 4. Multivariate Logistic Regression Analysis for ICU Death**

|                                        | Odds Ratio | 95% CI of Odds Ratio | P Value | Change in -2 Log Likelihood | P Value for Likelihood Ratio Tests | VIF  |
|----------------------------------------|------------|----------------------|---------|-----------------------------|------------------------------------|------|
| Hospital C                             | 0.67       | 0.40–1.11            | 0.122   | 0                           | —                                  | 1.15 |
| Trauma or burn for ICU admission       | 0.57       | 0.30–1.07            | 0.078   | 0                           | —                                  | 1.06 |
| GIT disorder for ICU admission         | 0.68       | 0.51–0.89            | 0.006   | 0                           | —                                  | 1.05 |
| Mechanical ventilation                 | 2.81       | 2.16–3.70            | < 0.001 | 68.5                        | < 0.001                            | 1.20 |
| APACHE II score (per 1)                | 1.18       | 1.17–1.20            | < 0.001 | 683                         | < 0.001                            | 1.26 |
| Mean blood glucose during ICU stay*    | 1.21       | 1.14–1.29            | < 0.001 | 17.1                        | < 0.001                            | 2.24 |
| SD of blood glucose during ICU stay*   | 1.28       | 1.14–1.44            | < 0.001 | 8.5                         | 0.004                              | 3.58 |
| Maximum blood glucose during ICU stay* | 0.95       | 0.92–0.98            | 0.003   | 7.9                         | 0.005                              | 2.04 |
| Admission blood glucose*               | 0.93       | 0.91–0.96            | < 0.001 | 16.7                        | < 0.001                            | 4.74 |

\* Odds ratio for each glucose variable indicates the change in risk of intensive care unit (ICU) mortality per 1-mmol change.

APACHE = Acute Physiology and Chronic Health Evaluation; CI = confidence interval; GIT = gastrointestinal tract; VIF = Variance Inflation Factor.

mortality for  $\text{Glu}_{\text{SD}}$  (< 1.7 vs. 2.5–3.5;  $P = 0.002$ ). On logistic regression analysis, diabetes was associated with decreased odds ratios for ICU mortality. In these hospitals, the area under the ROC for the predictive model was 0.86 (table 6).

Further multivariate logistic regression analysis was performed with ICU mortality as the dependent variable but also with other patient characteristics and clinical features and each of the seven glucose indices as independent variables. In these models, only  $\text{Glu}_{\text{Ave}}$ ,  $\text{Glu}_{\text{SD}}$ ,  $\text{Glu}_{\text{1Ave}}$ , and  $\text{Glu}_{\text{CV}}$  achieved statistical significance. The odds ratios for ICU mortality were 1.11, 1.12, 1.02, and 1.04 per each millimolar change in  $\text{Glu}_{\text{Ave}}$ ,  $\text{Glu}_{\text{SD}}$ , and  $\text{Glu}_{\text{1Ave}}$  and per each percent change in  $\text{Glu}_{\text{CV}}$ . For these models, the Hosmer-Lemeshow goodness-of-fit statistics were 24.1 ( $P = 0.002$ ), 23.8 (0.03), 21.8 (0.05), and 19.1 (0.14), respectively, for  $\text{Glu}_{\text{Ave}}$ ,  $\text{Glu}_{\text{SD}}$ ,  $\text{Glu}_{\text{1Ave}}$ , and  $\text{Glu}_{\text{CV}}$ . Figure 4 shows the time course of such outcome prediction ability for  $\text{Glu}_{\text{Ave}}$  and  $\text{Glu}_{\text{SD}}$ .

## Discussion

To understand the possible clinical significance of the variability of glucose concentration in the ICU, we conducted a multicenter retrospective observational study

of the correlation between such variability (assessed by its SD and, in addition, by the coefficient of variability) during ICU stay and subsequent ICU and hospital mortality in a large cohort of patients admitted to four different ICUs. We found that variability of glucose concentration was a significant and independent predictor of ICU and hospital mortality and that it was a stronger predictor of ICU mortality than mean glucose concentration. These observations suggest that variability in glucose concentration might be an important dimension of glucose control.

First, the quality, applicability, and generalizability of the data used for this study require assessment. In this regard, our study has several strengths, which include a large number of patients (the largest cohort so far in which glucose control has been assessed), a large number of glucose measurements, prospectively collected databases, a heterogeneous group of critically ill patients with a full spectrum of diagnoses, and a multicenter design.

There are also several potential limitations to this study. First, it is retrospective in nature, with all the inherent limitations of such studies. However, patient characteristics and outcome data were all collected prospectively for entry into the database. These data were

**Table 5. Multivariate Logistic Regression Analysis for Hospital Death**

|                                        | Odds Ratio | 95% CI of Odds Ratio | P Value | Change in -2 Log Likelihood | P Value for Likelihood Ratio Tests | VIF  |
|----------------------------------------|------------|----------------------|---------|-----------------------------|------------------------------------|------|
| Hospital A                             | 1.48       | 1.26–1.75            | < 0.001 | 0                           | —                                  | 1.38 |
| Hospital C                             | 0.60       | 0.40–0.89            | 0.011   | 0                           | —                                  | 1.66 |
| Surgical patients                      | 0.67       | 0.57–0.79            | < 0.001 | 16.1                        | < 0.001                            | 1.19 |
| Neurologic diseases                    | 1.42       | 1.14–1.77            | 0.002   | 0                           | —                                  | 1.12 |
| Mechanical ventilation                 | 1.81       | 1.51–2.17            | < 0.001 | 41.5                        | < 0.001                            | 1.39 |
| APACHE II score (per 1)                | 1.16       | 1.14–1.17            | < 0.001 | 733.4                       | < 0.001                            | 1.45 |
| Age (per 1 yr)                         | 1.02       | 1.01–1.02            | < 0.001 | 44.5                        | < 0.001                            | 1.24 |
| Mean blood glucose during ICU stay*    | 1.20       | 1.11–1.30            | < 0.001 | 21.7                        | < 0.001                            | 2.26 |
| SD of blood glucose during ICU stay*   | 1.18       | 1.07–1.31            | 0.013   | 5.6                         | 0.017                              | 3.60 |
| Maximum blood glucose during ICU stay* | 0.97       | 0.95–1.00            | 0.06    | 4.2                         | 0.042                              | 4.75 |
| Admission blood glucose*               | 0.95       | 0.93–0.98            | 0.001   | 10.3                        | 0.001                              | 2.05 |

\* Odds ratio for each glucose variables indicates the change in risk of intensive care unit (ICU) mortality per 1-mmol change.

APACHE = Acute Physiology and Chronic Health Evaluation; CI = confidence interval; VIF = Variance Inflation Factor.

**Fig. 3. (A and B) Relation between blood glucose control and intensive care unit (ICU) and hospital mortality in diabetic patients from hospitals A and D (n = 728). The SD of blood glucose was used as marker of blood glucose control for A, and the mean blood glucose level was used for B.  $\text{Glu}_{\text{Ave}}$  = mean blood glucose concentration;  $\text{Glu}_{\text{SD}}$  = SD of blood glucose concentration.**

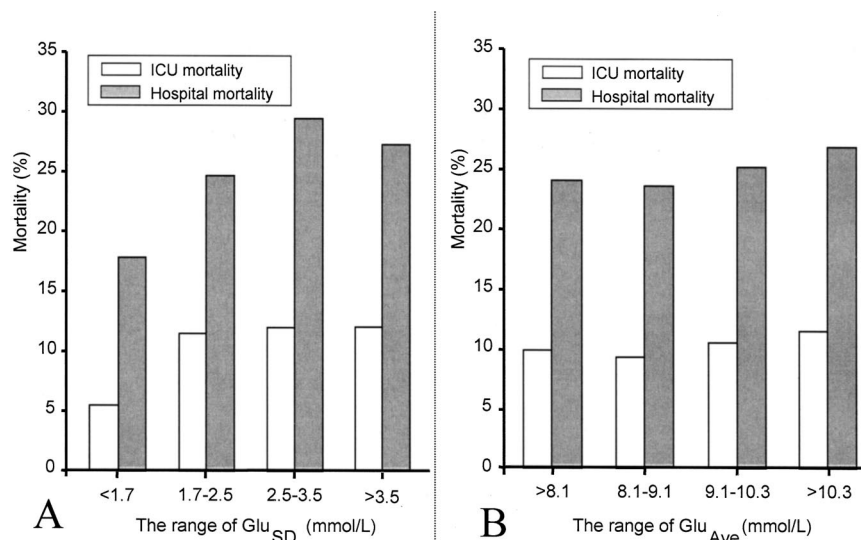

collected by trained data collectors, and all glucose data were objective, stored electronically at the time of collection, and verifiable. Furthermore, the outcomes are robust (death) and unlikely to have been incorrectly entered.

Second, we studied only four ICUs. However, we chose hospitals from two cities with a large number of patients. Therefore, our findings are likely to be robust. Nonetheless, we acknowledge that in other units or other countries with different styles of management, the findings might be different.

Third, there is a wide difference in mortality among institutions, which essentially reflects differences in case-mix for each ICU. This may limit the applicability of our findings to other institutions with a different case-mix. However, we performed multivariate logistic regression analysis entering site and reason for ICU admission in our model to adjust for case-mix and local practice style.

Fourth, the SD of blood glucose concentration, as presented, did not consider its time distribution, which might affect our findings.<sup>18</sup> However, assessment of changes in glucose SD over time indicates little time-

related effect. More importantly,  $\text{Glu}_{\text{SD}}$  showed a significantly greater area under the ROC curve than  $\text{Glu}_{\text{Ave}}$ . Time-related effects on the distribution of values should have affected both variables equivalently.

Fifth, our values for the area under the ROC curve (from 0.55 to 0.65) seem small. However, the focus of our study related to the comparison between  $\text{Glu}_{\text{Ave}}$  and  $\text{Glu}_{\text{SD}}$  rather than the assessment of glucose control indices as possible early prognostic tools. In this regard, the area under the ROC curve of  $\text{Glu}_{\text{SD}}$  was greater than that of  $\text{Glu}_{\text{Ave}}$ . Finally, it is unlikely that any single biochemical variable would have a sufficiently high value for its area under the ROC curve to be useful for early prognostication in ICU patients.

In our study, lack of information about the use and dose of insulin infusions, the use and dose of catecholamine infusions, the use and dose of corticosteroids therapy or hypoglycemic drugs, and the use and dose of nutritional support is an important limitation. These factors are likely to modulate the predictive ability of glucose control indices and future studies should focus on their impact.<sup>19,20</sup> Nonetheless, it is important to note that we focused on the relative comparison between the

**Table 6. Multivariate Logistic Regression Analysis for ICU Death in Subcohort Analysis (Hospitals A and D) Inclusive of Diabetic Patients**

|                                        | Odds Ratio | 95% CI of Odds Ratio | P Value | Change in -2 Log Likelihood | P Value for Likelihood Ratio Tests | VIF  |
|----------------------------------------|------------|----------------------|---------|-----------------------------|------------------------------------|------|
| Hospital A                             | 1.26       | 1.01-1.58            | 0.042   | 0                           | —                                  | 1.25 |
| GIT disorder for ICU admission         | 0.63       | 0.47-0.86            | 0.004   | 0                           | —                                  | 1.01 |
| Mechanical ventilation                 | 3.30       | 2.38-4.59            | < 0.001 | 60.8                        | < 0.001                            | 1.30 |
| APACHE II score (per 1)                | 1.18       | 1.16-1.20            | < 0.001 | 542.2                       | < 0.001                            | 1.14 |
| Mean blood glucose during ICU stay*    | 1.16       | 1.09-1.24            | < 0.001 | 8.7                         | 0.003                              | 2.26 |
| SD of blood glucose during ICU stay*   | 1.42       | 1.25-1.61            | < 0.001 | 10.5                        | 0.001                              | 3.74 |
| Maximum blood glucose during ICU stay* | 0.94       | 0.90-0.97            | < 0.001 | 11.1                        | < 0.001                            | 4.67 |
| Admission blood glucose*               | 0.94       | 0.91-0.97            | < 0.001 | 13.6                        | < 0.001                            | 2.03 |
| Diabetes                               | 0.57       | 0.41-0.80            | < 0.001 | 12.2                        | < 0.001                            | 1.19 |

\* Odds ratio for each glucose variables indicates the change in risk of intensive care unit (ICU) mortality per 1-mmol change.

APACHE = Acute Physiology and Chronic Health Evaluation; CI = confidence interval; GIT = gastrointestinal tract; VIF = Variance Inflation Factor.

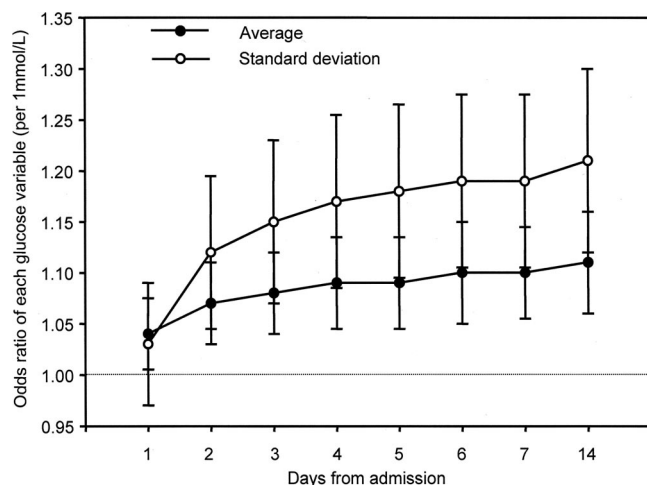

**Fig. 4.** Time course of the predictive ability of average and SD of blood glucose. Odds ratios (expressed with 95% confidence intervals) for glucose indexes indicate the risk change of intensive care unit mortality per 1-mmol change in each index. For example, average of blood glucose on 7 days from admission means average of entire glucose measurements during 7 days from admission. As time in intensive care unit increased, so did the ability of glucose control indices to predict outcome.

mean glucose concentration and the SD of glucose concentration rather than their absolute value. Our findings from multivariate logistic regression analysis suggest that variability of glucose control might be as important as the mean value of glucose control.

We also note that  $\text{Glu}_{\text{SD}}$  and  $\text{Glu}_{\text{Ave}}$  are not useful prognostic variables, because they can only be measured after ICU discharge. However, our intention was not to develop novel prognostic indices but rather to see whether evidence existed to support the hypothesis that variability of glucose control might be an important dimension of patient care and a predictor of hospital outcome.

It is important to appreciate that mean, SD, and maximum values of daily blood glucose concentration showed a narrow range of control after the second day of ICU stay. Therefore, after the second day, physicians seemed to manage blood glucose similarly, with little change until discharge. On the other hand, blood glucose control indices reached their highest values on the day of admission. This suggests that day 1 values, including  $\text{Glu}_{\text{Adm}}$ ,  $\text{Glu}_{\text{1Ave}}$ , and  $\text{Glu}_{\text{1SD}}$ , might be more likely to reflect the state of the patient's condition (patient's nutritional state, stress response, liver function, endogenous insulin, severity of illness, and other factors) than later measurements. In fact, the maximum level of glucose concentration occurred on day 1 in 65% of patients. Therefore, in this study,  $\text{Glu}_{\text{Max}}$  might have mostly reflected the patients' physiologic condition. In this respect, several studies have reported that hyperglycemia and admission blood glucose and glucose indices during first 24 h in the ICU correlate with a higher mortality.<sup>12,16,21</sup> In these studies, however, glucose control indices were never adjusted for other prognostic variables

to assess their independent contribution. In our multivariate logistic regression analysis, against previous reports,  $\text{Glu}_{\text{Max}}$  and  $\text{Glu}_{\text{Adm}}$  showed ICU mortality odds ratios of less than 1.0 (0.95 and 0.94 per 1 mm, respectively). In the absence of information on insulin treatment and nutritional support, we are unable to speculate on the reasons for such observations.

In the same analysis, the mean and SD of blood glucose during the first 24 h did not predict mortality. Both of these glucose control indices, however, developed greater predictive ability as more ICU days were taken into account for their calculation. These results are consistent with the view that 24 h might be too short a time to show the effect of glucose control on outcome. They might also reflect the fact that patients who have a short ICU stay both have better outcomes and contribute no data after the second day of admission creating a possible selection bias. Finally, if variability of glucose levels affects outcome, it may take days for it to do so. Each one of the above factors alone or in combination may explain why glucose indices during first 24 h did not predict mortality. These speculations, however, cannot be verified with our data set.

Our findings must also be seen within the context of previous investigations. Four randomized controlled trials have been performed comparing two levels of glucose control for critical ill patients so far. The Diabetes Mellitus, Insulin Glucose Infusion in Acute Myocardial Infarction study was a multicenter trial that included only diabetic patients with acute myocardial infarction. This study compared glucose-insulin-potassium therapy (targeted blood glucose range 7.0–10.9 mm: mean blood glucose  $9.6 \pm 3.3$  mm) with a control group (no specific protocol: mean blood glucose  $11.7 \pm 4.1$  mm) (the relative and absolute reductions of SD were 20% and 0.8 mm).<sup>5,6</sup> This study reported a significant reduction in 1-yr mortality but no change in short-term outcome (coronary care or hospital mortality). Van den Berghe *et al.*<sup>9</sup> showed that postoperative ICU patients allocated to intensive insulin therapy had a 42% risk reduction in ICU and hospital mortality when compared with patients receiving conventional glucose control. Relative and absolute reductions of SD associated with this treatment were 42% and 0.8 mm. Gray and Perdrizet<sup>22</sup> showed that strict glucose control reduced nosocomial infection significantly when compared with standard glucose control. Relative and absolute reductions in SD reported in this study were 41% and 1.4 mm. In the Diabetes Mellitus, Insulin Glucose Infusion in Acute Myocardial Infarction II study, the blood glucose information was reported only at randomization and after 24 h.<sup>23</sup> Therefore, no information about variability could be obtained. The Diabetes Mellitus, Insulin Glucose Infusion in Acute Myocardial Infarction II study reported no significant difference in outcome among the three different blood glucose groups. Other evidence exists on the possible



benefits of better glucose control for patients.<sup>24-31</sup> More recently, Van den Berghe *et al.*<sup>32</sup> studied the effect of intensive insulin therapy in medical ICU patients. They found that, although mortality was not reduced, morbidity was significantly decreased. However, there is no clear understanding of the mechanisms. In studies with tight glucose control protocols, the mean glucose typically decreases but so does variability. Which of these two is more important in determining the putative benefit of glycemic control remains unclear. Only randomized controlled studies comparing two different targeted glucose ranges in which both groups are treated according to similar protocols aimed at decreasing variability would allow us to better understand the clinical significance of variability control. This is more than a simple theoretical concern because, if reducing swings in blood glucose concentration were a major biologic mechanism behind the putative benefits of glucose control, it would not be necessary to pursue lower glucose levels with the attendant risks of hypoglycemia. As recently shown,<sup>33</sup> fluctuations in glucose concentration may indeed trigger adverse biologic events beyond those of chronic sustained hyperglycemia and specifically and independently trigger oxidative stress.

Finally, we found that, in the two hospitals where this could be tested, diabetes affected our findings. First, it decreased the odds ratio for ICU mortality to 0.57. This effect, after glucose control indices have been controlled for, is essentially identical to the findings of van den Berghe *et al.*,<sup>34</sup> who also found that the presence of diabetes was associated with an odds ratio of 0.36 for ICU mortality. Further, we found that, unlike nondiabetic subjects, patients with diabetes did not display an association between increasing levels of blood glucose or glucose variability and ICU or hospital mortality. We have insufficient information to speculate on the mechanisms responsible for these findings. However, they suggest that diabetic patients may behave in a unique way with regard to their response to the biologic effects of hyperglycemia.

In summary, using a large multicenter cohort of patients and set of glucose measurements, we found that the SD and coefficient of variability of glucose were independent predictors of ICU and hospital mortality and that their predictive ability was greater than that of the mean blood glucose concentration. Decreasing variability of blood glucose concentration might be an important dimension of glucose management, a possible mechanism by which intensive insulin therapy exerts its beneficial effects, and an important goal of glucose management in the ICU. In addition, diabetic patients may represent a subpopulation with a unique response to hyperglycemia. Further investigations of the clinical significance of blood glucose variability in other settings and other ICUs seem desirable.

## References

1. Wolfe RR, Allsop JR, Burke JF: Glucose metabolism in man: Responses to intravenous glucose infusion. *Metabolism* 1979; 28:210-20
2. Shangraw RE, Jahoor F, Miyoshi H, Neff WA, Stuart CA, Herndon DN, Wolfe RR: Differentiation between septic and postburn insulin resistance. *Metabolism* 1989; 38:983-9
3. Robinson LE, van Soeren MH: Insulin resistance and hyperglycemia in critical illness: Role of insulin in glycemic control. *AACN Clin Issues* 2004; 15:45-62
4. Coursin DB, Connery LE, Ketzler JT: Perioperative diabetic and hyperglycemic management issues. *Crit Care Med* 2004; 32:S116-25
5. Malmberg K, Ryden L, Efendic S, Herlitz J, Nicol P, Waldenstrom A, Wedel H, Welin L: Randomized trial of insulin-glucose infusion followed by subcutaneous insulin treatment in diabetic patients with acute myocardial infarction (DIGAMI study): Effects on mortality at 1 year. *J Am Coll Cardiol* 1995; 26:57-65
6. Malmberg K: Prospective randomized study of intensive insulin treatment on long term survival after acute myocardial infarction in patients with diabetes mellitus. DIGAMI (Diabetes Mellitus, Insulin Glucose Infusion in Acute Myocardial Infarction) Study Group. *BMJ* 1997; 314:1512-5
7. Ouattara A, Lecomte P, Le Manach Y, Landi M, Jacqueminet S, Platonov I, Bonnet N, Riou B, Coriat P: Poor intraoperative blood glucose control is associated with a worsened hospital outcome after cardiac surgery in diabetic patients. *ANESTHESIOLOGY* 2005; 103:687-94
8. Kersten JR, Wartier DC, Pagel PS: Aggressive control of intraoperative blood glucose concentration: A shifting paradigm? *ANESTHESIOLOGY* 2005; 103:677-8
9. van den Berghe G, Wouters P, Weekers F, Verwaest C, Bruyninckx F, Schetz M, Vlasselaers D, Ferdinande P, Lauwers P, Bouillon R: Intensive insulin therapy in the critically ill patients. *N Engl J Med* 2001; 345:1359-67
10. Leow MK, Wyckoff J: Under-recognized paradox of neuropathy from rapid glycaemic control. *Postgrad Med J* 2005; 81:103-7
11. Krinsley JS: Effect of an intensive glucose management protocol on the mortality of critically ill adult patients. *Mayo Clin Proc* 2004; 79:992-1000
12. Christiansen C, Toft P, Jorgensen HS, Andersen SK, Tonnesen E: Hyperglycaemia and mortality in critically ill patients: A prospective study. *Intensive Care Med* 2004; 30:1685-8
13. Bolk J, van der Ploeg T, Cornel JH, Arnold AE, Sepers J, Umans VA: Impaired glucose metabolism predicts mortality after a myocardial infarction. *Int J Cardiol* 2001; 79:207-14
14. Lanzino G, Kassell NF, Germanson T, Truskowski L, Alves W: Plasma glucose levels and outcome after aneurysmal subarachnoid hemorrhage. *J Neurosurg* 1993; 79:885-91
15. Margulies DR, Hiatt JR, Vinson D Jr, Shabot MM: Relationship of hyperglycemia and severity of illness to neurologic outcome in head injury patients. *Am Surg* 1994; 60:387-90
16. Suleiman M, Hammerman H, Boulous M, Kapeliovich MR, Suleiman A, Agmon Y, Markiewicz W, Aronson D: Fasting glucose is an important independent risk factor for 30-day mortality in patients with acute myocardial infarction: A prospective study. *Circulation* 2005; 111:754-60
17. Knaus WA, Draper EA, Wagner DP, Zimmerman JE: APACHE II: A severity of disease classification system. *Crit Care Med* 1985; 13:818-29
18. van der Horst IC, Gans RO, Nijsten MW, Ligtenberg JJ: Beneficial effect of glucose-insulin-potassium infusion in noncritically ill patients has to be proven. *J Intern Med* 2003; 254:513-4
19. Schricker T, Gougeon R, Eberhart L, Wykes L, Mazza L, Carvalho G, Carli F: Type 2 diabetes mellitus and the catabolic response to surgery. *ANESTHESIOLOGY* 2005; 102:320-6
20. Amour J, David JS, Vivien B, Coriat P, Riou B: Interaction of halogenated anesthetics with  $\alpha$ - and  $\beta$ -adrenoceptor stimulations in diabetic rat myocardium. *ANESTHESIOLOGY* 2004; 101:1145-52
21. Finney SJ, Zekveld C, Elia A, Evans TW: Glucose control and mortality in critically ill patients. *JAMA* 2003; 290:2041-7
22. Grey NJ, Perdrizet GA: Reduction of nosocomial infections in the surgical intensive-care unit by strict glycemic control. *Endocr Pract* 2004; 10 (suppl 2):46-52
23. Malmberg K, Ryden L, Wedel H, Birkeland K, Bootsma A, Dickstein K, Efendic S, Fisher M, Hamsten A, Herlitz J, Hildebrandt P, Macleod K, Laakso M, Torp-Pedersen C, Waldenstrom A: Intense metabolic control by means of insulin in patients with diabetes mellitus and acute myocardial infarction (DIGAMI 2): Effects on mortality and morbidity. *Eur Heart J* 2005; 26:650-61
24. Lynch M, Gammage MD, Lamb P, Natrass M, Pentecost BL: Acute myocardial infarction in diabetic patients in the thrombolytic era. *Diabet Med* 1994; 11:162-5
25. Leor J, Goldbourt U, Reicher-Reiss H, Kaplinsky E, Behar S: Cardiogenic shock complicating acute myocardial infarction in patients without heart failure on admission: Incidence, risk factors, and outcome. *SPRINT Study Group. Am J Med* 1993; 94:265-73
26. O'Sullivan JJ, Conroy RM, Robinson K, Hickey N, Mulcahy R: In-hospital prognosis of patients with fasting hyperglycemia after first myocardial infarction. *Diabetes Care* 1991; 14:758-60
27. Capes SE, Hunt D, Malmberg K, Gerstein HC: Stress hyperglycaemia and



increased risk of death after myocardial infarction in patients with and without diabetes: A systematic overview. *Lancet* 2000; 355:773-8

28. Furnary AP, Zerr KJ, Grunkemeier GL, Starr A: Continuous intravenous insulin infusion reduces the incidence of deep sternal wound infection in diabetic patients after cardiac surgical procedures. *Ann Thorac Surg* 1999;67:352-60; discussion 360-2

29. Furnary AP, Gao G, Grunkemeier GL, Wu Y, Zerr KJ, Bookin SO, Floten HS, Starr A: Continuous insulin infusion reduces mortality in patients with diabetes undergoing coronary artery bypass grafting. *J Thorac Cardiovasc Surg* 2003; 125:1007-21

30. Gore DC, Chinkes D, Hegggers J, Herndon DN, Wolf SE, Desai M: Association of hyperglycemia with increased mortality after severe burn injury. *J Trauma* 2001; 51:540-4

31. Laird AM, Miller PR, Kilgo PD, Meredith JW, Chang MC: Relationship of early hyperglycemia to mortality in trauma patients. *J Trauma* 2004; 56:1058-62

32. Van den Berghe G, Wilmer A, Hermans G, Meersseman W, Wouters PJ, Milants I, Van Wijngaerden, Bobbaers H, Bouillon R: Intensive insulin therapy in the medical ICU. *N Engl J Med* 2006; 354:449-61

33. Monnier L, Mas E, Ginet C, Michel F, Villon L, Cristol J-P, Colette C: Activation of oxidative stress by acute glucose fluctuations compared with sustained chronic hyperglycemia in patients with type 2 diabetes. *JAMA* 2006; 295:1681-7

34. Van den Berghe G, Wouters PJ, Bouillon R, Weekers F, Verwaest C, Schetz M, Vlasselaers D, Ferdinande P, Lauwers P: Outcome benefit of intensive insulin therapy in the critically ill: Insulin dose *versus* glycemic control. *Crit Care Med* 2003; 31:359-66
